# Supplementary material for: Biomass-derived highly graphitized hard carbon materials via tandem carbonization–graphitization for high-performance sodium-ion batteries
Source: Royal Society of Chemistry journal article supplement (doi:10.1039/d5gc06092c), 2026-01-01
Supplement: d5gc06092c1.pdf [file d5gc06092c1.pdf]

## Supporting Information

# **Biomass-derived highly graphitized hard carbon *via* tandem carbonization-graphitization for high-performance sodium-ion batteries**

Tianqi Cao, Guanyu Zhang, Zengjian Guo, Jiarui Zhu, Ge Kong, Xuesong Zhang\*, Lujia Han.

*Engineering Laboratory for AgroBiomass Recycling & Valorizing, College of Engineering, China*

*Agricultural University, Beijing 100083, China*

*\*Corresponding author, E-mail: [xs Zhang@cau.edu.cn](mailto:xs Zhang@cau.edu.cn)*

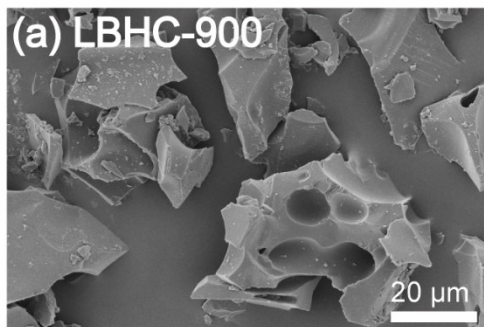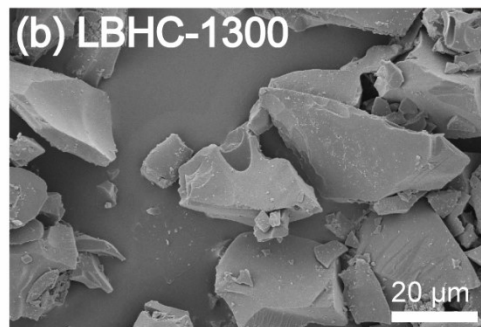

**Figure S1.** SEM image of (a) LBHC-900, and (b) LBHC-1300.

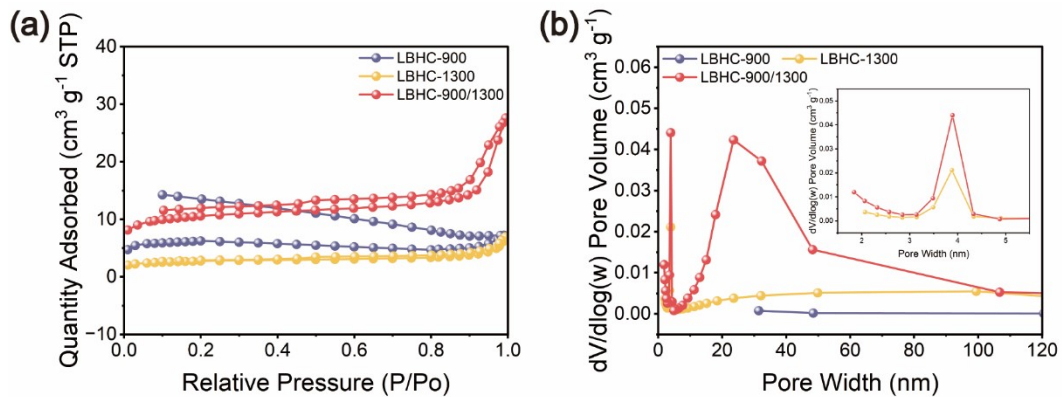

**Figure S2.** (a) N<sub>2</sub> sorption-desorption isotherms, (b) pore size distribution of lignin-based hard carbon materials.

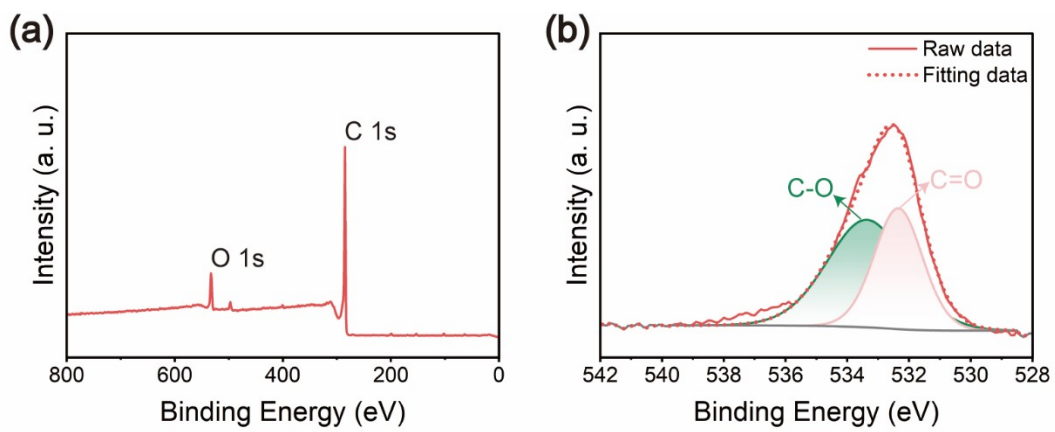

**Figure S3.** (a) Full survey, and (b) High-resolution O 1s XPS spectra of LBHC.

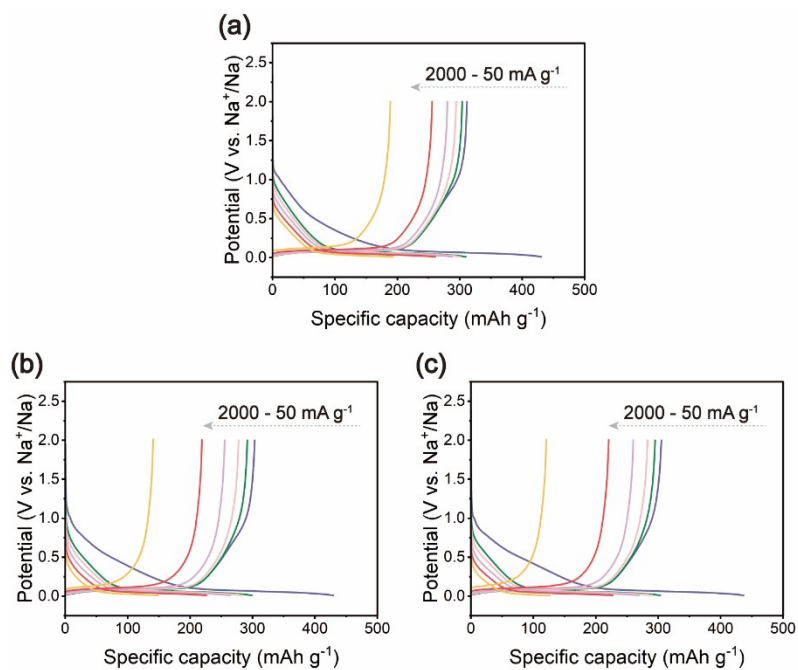

**Figure S4.** The GCD curves of (a) CBHC, (b) LBHC, and (c) SBHC at the current density increased from 50 to 2000 mA g<sup>-1</sup>.

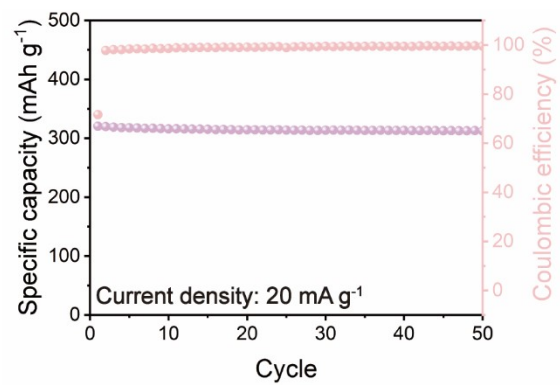

**Figure S5.** Cycling stability of CBHC at the current density of 20 mA g<sup>-1</sup>.

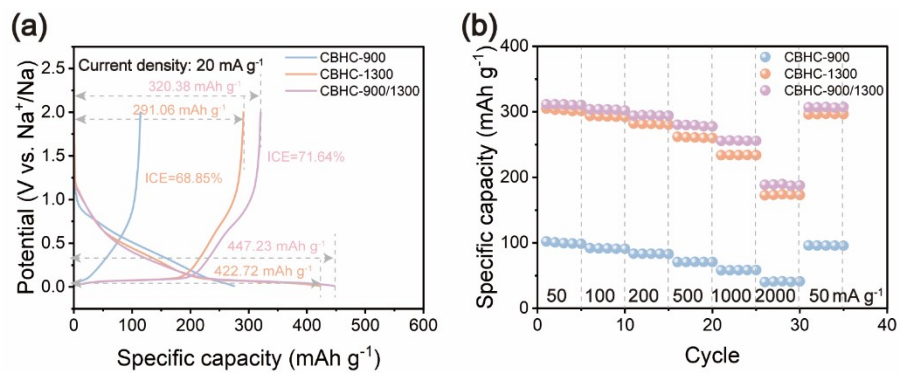

**Figure S6.** Electrochemical performance of CBHC in Na//HC half-cells; (a) initial charge and discharge curves of CBHC-900/1300 at  $20 \text{ mA g}^{-1}$ ; (b) rate performance

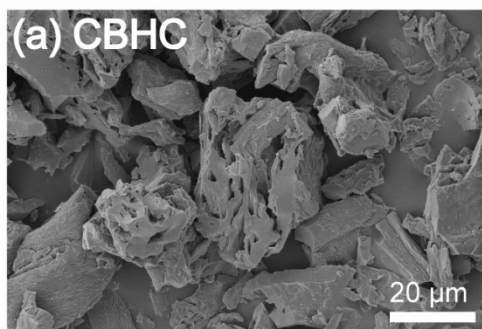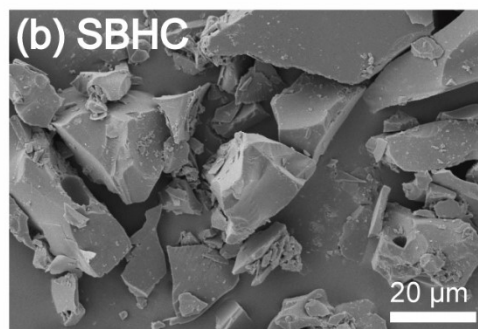

**Figure S7.** SEM image of (a) CBHC, and (b) SBHC.

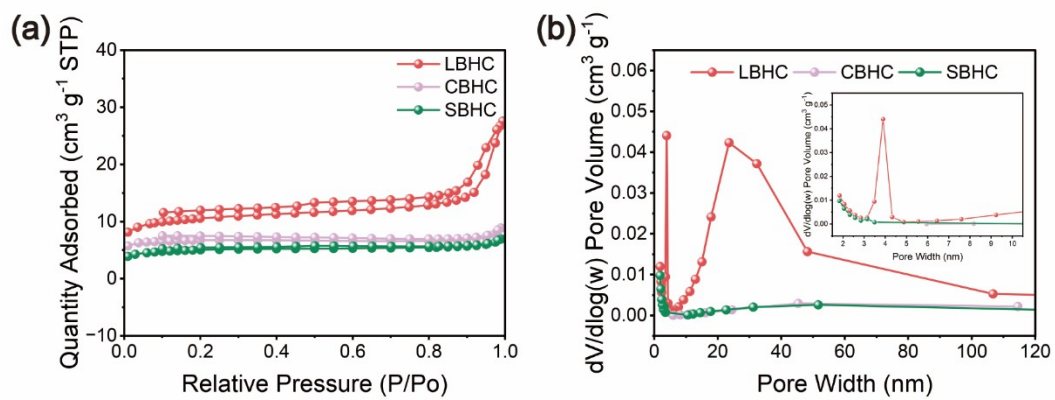

**Figure S8.** (a) N<sub>2</sub> sorption–desorption isotherms, (b) pore size distribution of biomass-based hard carbon materials.

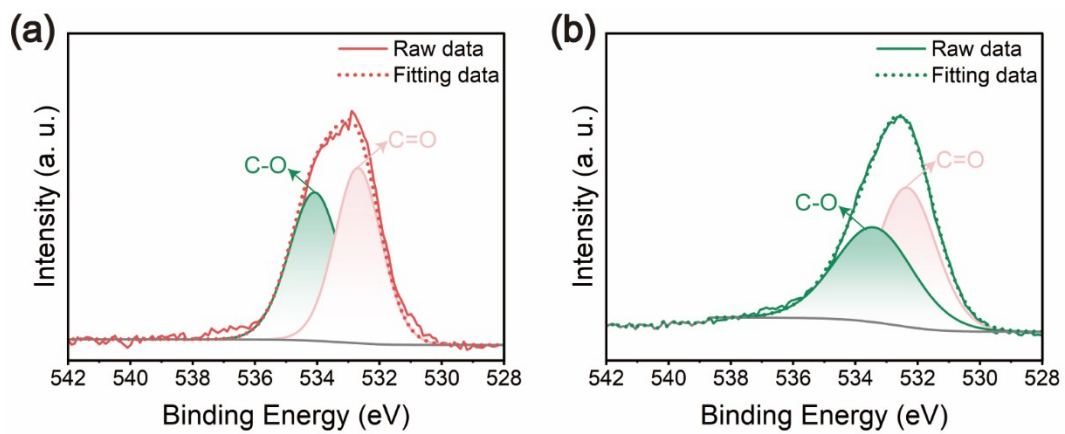

**Figure S9.** High-resolution O 1s XPS spectra of (a) CBHC and (b) SBHC.

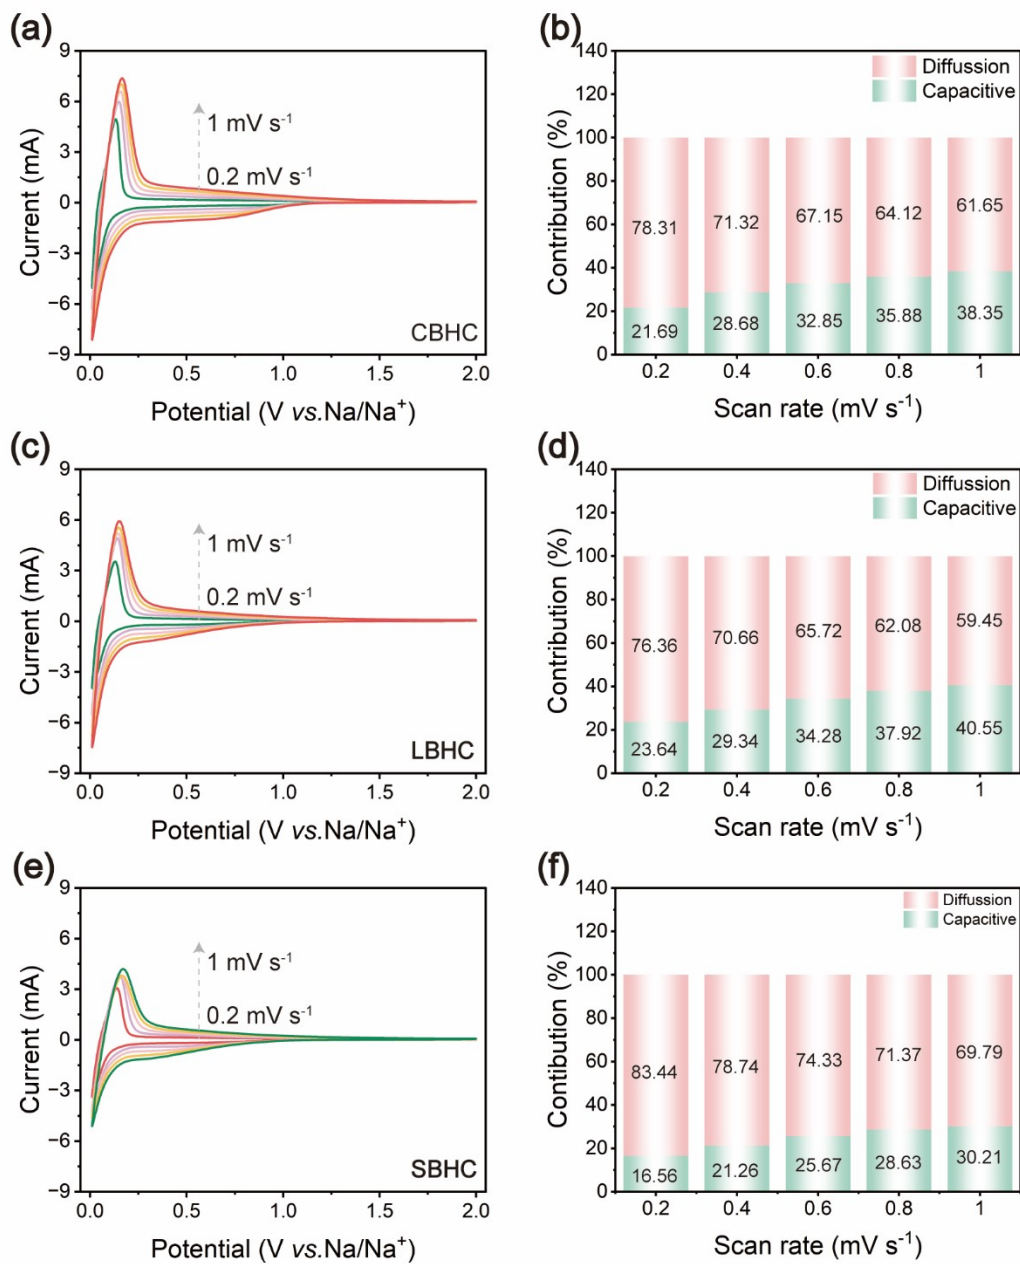

**Figure S10.** (a) cyclic voltammograms of CBHC at various scan rates; (b) the capacitive contribution of CBHC; (c) Cyclic voltammograms of LBHC at various scan rates; (d) The capacitive contribution of LBHC; (e) Cyclic voltammograms of SBHC at various scan rates; (f) The capacitive contribution of SBHC.

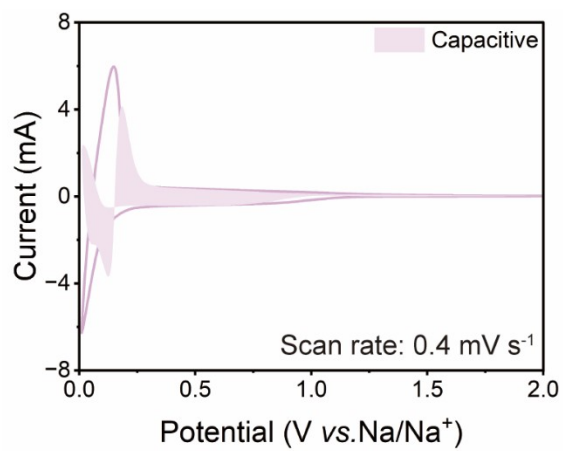

**Figure S11.** The capacitive contribution of CBHC at 0.4 mV s<sup>-1</sup>.

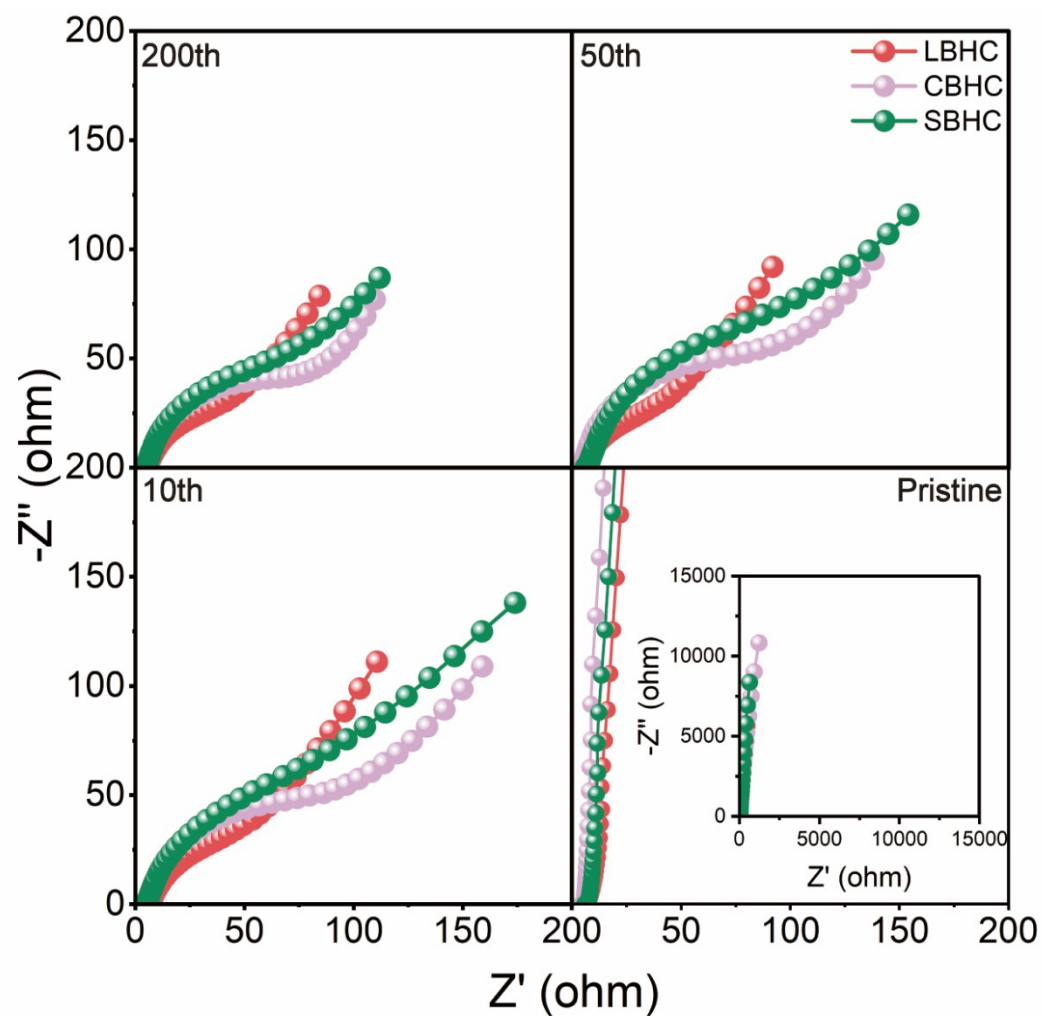

**Figure S12.** Nyquist plots of the EIS data for the biomass-based highly graphitization hard carbon materials before and after different cycles.

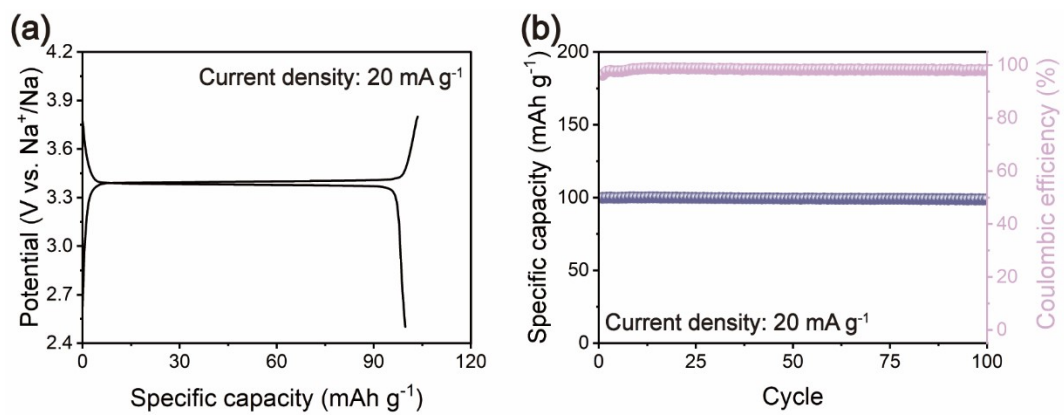

**Figure S13.** The electrochemical performance of NVP cathode in half-cell. (a) The GCD curves, and (b) Cycling stability of NVP cathode at 20 mA g<sup>-1</sup>.

**Table S1.** The rate performance for biomass-based hard carbon.

| Current density (mA g <sup>-1</sup> ) | Average specific capacity (mAh g <sup>-1</sup> ) |                    |                    |                    |                    |                    |                    |
|---------------------------------------|--------------------------------------------------|--------------------|--------------------|--------------------|--------------------|--------------------|--------------------|
|                                       | 50                                               | 100                | 200                | 500                | 1000               | 2000               | 50                 |
| Sample                                |                                                  |                    |                    |                    |                    |                    |                    |
| LBHC-90                               | 247.37<br>(285.88)                               | 233.98<br>(237.31) | 220.17<br>(222.94) | 199.98<br>(202.71) | 174.40<br>(176.44) | 122.55<br>(124.84) | 241.60<br>(232.34) |
| LBHC-1300                             | 301.69<br>(334.18)                               | 289.69<br>(293.25) | 276.08<br>(278.57) | 246.91<br>(249.16) | 197.66<br>(199.12) | 101.46<br>(102.70) | 292.63<br>(287.95) |
| LBHC-900/1300 (LBHC)                  | 301.37<br>(331.16)                               | 290.07<br>(293.19) | 276.96<br>(279.30) | 253.96<br>(256.38) | 218.31<br>(220.04) | 139.87<br>(141.52) | 294.51<br>(288.24) |
| CBHC                                  | 311.01<br>(338.23)                               | 303.30<br>(305.59) | 294.44<br>(296.35) | 279.03<br>(281.00) | 255.94<br>(257.25) | 188.47<br>(189.56) | 306.94<br>(302.60) |
| SBHC                                  | 304.10<br>(335.10)                               | 294.06<br>(297.14) | 281.91<br>(284.40) | 259.24<br>(261.58) | 219.81<br>(221.32) | 120.85<br>(122.01) | 299.06<br>(293.11) |

**Table S2.** The comparisons regarding electrochemical performance of hard carbons in full-cells.

| Material                                                                                                                  | Reversible capacity                                                | Capacity retention                            | Energy density (Wh kg <sup>-1</sup> ) | Powder density (W kg <sup>-1</sup> ) | Electrolyte                                                 | Ref.          |
|---------------------------------------------------------------------------------------------------------------------------|--------------------------------------------------------------------|-----------------------------------------------|---------------------------------------|--------------------------------------|-------------------------------------------------------------|---------------|
| Conventional hard carbon//Na <sub>3</sub> V <sub>2</sub> (PO <sub>4</sub> ) <sub>3</sub>                                  | -                                                                  | -                                             | 109.3                                 | -                                    | 1 M NaClO <sub>4</sub> in PC+ 5 vol% FEC                    | <sup>1</sup>  |
| Carbon nanofiber//Na <sub>3</sub> V <sub>2</sub> (PO <sub>4</sub> ) <sub>3</sub>                                          |                                                                    |                                               | 87.1                                  | -                                    |                                                             |               |
| reduced graphene oxide//Na <sub>3</sub> V <sub>2</sub> (PO <sub>4</sub> ) <sub>3</sub>                                    |                                                                    |                                               | 87.2                                  | -                                    |                                                             |               |
| NDCS// Na <sub>3</sub> V <sub>2</sub> (PO <sub>4</sub> ) <sub>3</sub>                                                     |                                                                    |                                               | 146.1                                 | -                                    |                                                             |               |
| NHC-0.8M-800//Na <sub>3</sub> V <sub>2</sub> (PO <sub>4</sub> ) <sub>2</sub> O <sub>2</sub> F                             | 116 mAh g <sup>-1</sup> at 50 mA g <sup>-1</sup>                   | 86% (1000 cycles at 500 mA g <sup>-1</sup> )  | 301                                   | 123                                  | 1 M NaPF <sub>6</sub> in DME                                | <sup>2</sup>  |
| HCMP-CO <sub>2</sub> // Na <sub>3</sub> V <sub>2</sub> (PO <sub>4</sub> ) <sub>3</sub>                                    | 61 mAh g <sup>-1</sup> at 600 mA g <sup>-1</sup>                   | 80.9% (800 cycles at 200 mA g <sup>-1</sup> ) | 281                                   | 74                                   | 1 M NaPF <sub>6</sub> in DEGDME                             | <sup>3</sup>  |
| SCHC1300// Na <sub>3</sub> V <sub>2</sub> (PO <sub>4</sub> ) <sub>3</sub>                                                 | 299 mAh g <sup>-1</sup> at 0.1C                                    | 86% (80 cycles at 0.5 C)                      | 201                                   | -                                    | 1 M NaPF <sub>6</sub> in DEGDME                             | <sup>4</sup>  |
| CoHC// Na <sub>3</sub> V <sub>2</sub> (PO <sub>4</sub> ) <sub>3</sub> <sup>a</sup>                                        | 270mAh g <sup>-1</sup> at 5000 mA g <sup>-1</sup>                  | 94% (150 cycles at 100 mA g <sup>-1</sup> )   | 255.2                                 | 19.68                                | 1 M NaPF <sub>6</sub> in DEGDME                             | <sup>5</sup>  |
| PAHC-1500// Na <sub>3</sub> V <sub>2</sub> (PO <sub>4</sub> ) <sub>3</sub> <sup>a</sup>                                   | 102.2 mAh g <sup>-1</sup> at 0.1 C (1C=117.6 mAh g <sup>-1</sup> ) | -                                             | 242.1                                 | 28.1                                 | 1 M NaPF <sub>6</sub> in DEGDME                             | <sup>6</sup>  |
| HC-1500// Na <sub>x</sub> TMO <sub>2</sub> <sup>a</sup>                                                                   | 300 mAh g <sup>-1</sup> at 20 mA g <sup>-1</sup>                   | -                                             | 243.4                                 | -                                    | 1 M NaPF <sub>6</sub> in DEGDME                             | <sup>7</sup>  |
| HC-150-09// Na <sub>4</sub> Fe <sub>3</sub> (PO <sub>4</sub> ) <sub>2</sub> (P <sub>2</sub> O <sub>7</sub> ) <sup>b</sup> | 277.25 mAh g <sup>-1</sup> at 0.1 C (1C=300 mAh g <sup>-1</sup> )  | -                                             | 225.03                                | 23.19                                | 1 M NaPF <sub>6</sub> in DEGDME                             | <sup>8</sup>  |
| HCA10// Na <sub>3</sub> V <sub>2</sub> (PO <sub>4</sub> ) <sub>3</sub> <sup>a</sup>                                       | 307.2 mAh g <sup>-1</sup> at 30 mA g <sup>-1</sup>                 | 81.7% (300 cycles at 300 mA g <sup>-1</sup> ) | 309.4                                 | -                                    | 1 M NaPF <sub>6</sub> in DME                                | <sup>9</sup>  |
| PCHC-10// Na <sub>3</sub> V <sub>2</sub> (PO <sub>4</sub> ) <sub>3</sub>                                                  | -                                                                  | -                                             | 231.2                                 | 24.1                                 | 1 M NaClO <sub>4</sub> in EC: DEC = 1:1 vol % + 5 vol% FEC) | <sup>10</sup> |
| CSC// Na <sub>3</sub> V <sub>2</sub> (PO <sub>4</sub> ) <sub>3</sub> <sup>a</sup>                                         | 299 mAh g <sup>-1</sup> at 0.1C (1C=300 mA g <sup>-1</sup> )       | 89% (80 cycles at 0.5 C)                      | 212                                   | -                                    | 1 M NaPF <sub>6</sub> in DEGDME                             | <sup>11</sup> |
| TC10%// Na <sub>3</sub> V <sub>2</sub> (PO <sub>4</sub> ) <sub>3</sub> <sup>a</sup>                                       | 230 mAh g <sup>-1</sup> at 0.05C (1C=300 mA g <sup>-1</sup> )      | 89.2% (100 cycles at 0.05 C)                  | -                                     | -                                    | 1 M NaPF <sub>6</sub> in EC: DEC = 1:1 vol %                | <sup>12</sup> |
| RHHC-1300// Na <sub>3</sub> V <sub>2</sub> (PO <sub>4</sub> ) <sub>2</sub> F <sub>3</sub> /C <sup>a</sup>                 | 258 mAh g <sup>-1</sup> at 25 mA g <sup>-1</sup>                   | -                                             | 185                                   | -                                    | 1 M NaClO <sub>4</sub> in EC: DEC = 1:1 vol %               | <sup>13</sup> |
| H300-1100// Na <sub>3</sub> V <sub>2</sub> (PO <sub>4</sub> ) <sub>3</sub> <sup>a</sup>                                   | 310.4 mAh g <sup>-1</sup> at 50 mA g <sup>-1</sup>                 | 85.2% (55 cycles at 50 mA g <sup>-1</sup> )   | 243.1                                 | -                                    | 1 M NaPF <sub>6</sub> in EC: DEC = 1:1 vol %                | <sup>14</sup> |
| H-OLHC1300 °C// Na <sub>3</sub> V <sub>2</sub> (PO <sub>4</sub> ) <sub>3</sub>                                            | 307.2 mAh g <sup>-1</sup> at 50 mA g <sup>-1</sup>                 | 83.3% (200 cycles at                          | -                                     | -                                    | 1 M NaPF <sub>6</sub> in DEGDME                             | <sup>15</sup> |

|                                                                                     |                                                    |                                               |        |       |                                 |               |
|-------------------------------------------------------------------------------------|----------------------------------------------------|-----------------------------------------------|--------|-------|---------------------------------|---------------|
|                                                                                     |                                                    | 600 mA g <sup>-1</sup> )                      |        |       |                                 |               |
| Zn-HC// Na <sub>3</sub> V <sub>2</sub> (PO <sub>4</sub> ) <sub>3</sub> <sup>a</sup> | 524 mAh g <sup>-1</sup> at 50 mA g <sup>-1</sup>   | 86% (650 cycles at 2000 mA g <sup>-1</sup> )  | 323    | -     | 1 M NaPF <sub>6</sub> in DEGDME | <sup>16</sup> |
| CBHC// Na <sub>3</sub> V <sub>2</sub> (PO <sub>4</sub> ) <sub>3</sub>               | 144.57 mAh g <sup>-1</sup> at 50mA g <sup>-1</sup> | 99.05% (50 cycles at 200 mA g <sup>-1</sup> ) | 110.05 | 37.90 | 1 M NaPF <sub>6</sub> in DEGDME | This work     |

<sup>a</sup>: The reversible capacity calculated based on the mass of anode; <sup>b</sup>: The reversible capacity calculated based on the mass of cathode.

## References

1. T. Yang, T. Qian, M. Wang, X. Shen, N. Xu, Z. Sun and C. Yan, *Advanced Materials*, 2016, **28**, 539-545.
2. Y.-J. Xu, Y.-Y. Wang, Z.-Y. Gu, C.-S. Zhao, X.-L. Wu, S. R. P. Silva and B.-H. Hou, *Energy Storage Materials*, 2025, **75**, 104031.
3. Z. Zheng, S. Hu, W. Yin, J. Peng, R. Wang, J. Jin, B. He, Y. Gong, H. Wang and H. J. Fan, *Advanced Energy Materials*, 2024, **14**, 2303064.
4. Y. Sun, T. Shen, Z. He and S. Wang, *Journal of Colloid and Interface Science*, 2025, **678**, 1142-1150.
5. R. Zhou, S. Peng, Z. Wang, Y. Zhao, C. Bao, Y. Xia, Y. Zhu, H. Yang, Z. Bo and Q. Yu, *Advanced Functional Materials*, 2025, **n/a**, 2423530.
6. G. Ren, Y. Qiao, J. Jing, J. Tian, X. Wang, G. Lv, Y. Wang, Y. Liu, Q. Tan and Y. Chen, *Energy Storage Materials*, 2025, **80**, 104367.
7. L. Sun, J. Li, L. Wang, E. Li and W. Huang, *Journal of Power Sources*, 2024, **624**, 235474.
8. S. Mirza, J. Han, G. Ying, Y. Qiu, H. Zhang, Q. Zheng and X. Li, *Journal of Energy Storage*, 2025, **107**, 114969.
9. H. Xu, H. Song, M. Sun, Y. Zhang, X. Feng, W. Qin, C. Wu, S. Chou and X. Wu, *Nano Energy*, 2025, **137**, 110824.
10. D. Sun, L. Zhao, P. Sun, K. Zhao, Y. Sun, Q. Zhang, Z. Li, Z. Ma, F. Zheng, Y. Yang, C. Lu, C. Peng, C. Xu, Z. Xiao and X. Ma, *Advanced Functional Materials*, 2024, **34**, 2403642.
11. Y. Sun, T. Shen, H. Pan, Z. He, B. Ru, G. Dai and S. Wang, *Applied Surface Science*, 2025, **680**, 161422.
12. Z. Fu, D. Jiang, Z. Tang, Z. Tang, J. Zhou, R. Liu, H. Li, D. Sun, Y. Tang and H. Wang, *Chemical Engineering Journal*, 2025, **505**, 159431.
13. Q. Wang, X. Zhu, Y. Liu, Y. Fang, X. Zhou and J. Bao, *Carbon*, 2018, **127**, 658-666.
14. M. Song, Z. Yi, R. Xu, J. Chen, J. Cheng, Z. Wang, Q. Liu, Q. Guo, L. Xie and C. Chen, *Energy Storage Materials*, 2022, **51**, 620-629.
15. M. Ishaq, M. Jabeen, Y.-S. He, H. Che, W. Xu, S. Zhao, Y. Shen, L. Li and Z.-F. Ma, *Advanced Energy Materials*, 2024, **n/a**, 2403142.

16. Z. Lu, J. Wang, W. Feng, X. Yin, X. Feng, S. Zhao, C. Li, R. Wang, Q.-A. Huang and Y. Zhao, *Advanced Materials*, 2023, **35**, 2211461.
